# Supplementary material for: Patterning of L10FePt nanoparticles with ultra-high coercivity for bit-patterned media
Source: Royal Society of Chemistry journal article supplement (doi:10.1039/c6nr07863j), 2016-11-29
Supplement: c6nr07863j1.pdf [file c6nr07863j1.pdf]

# **Patterning of L1<sub>0</sub> FePt Nanoparticles with Ultra-high Coercivity for Bit-patterned Media**

Zhengong Meng,<sup>a†</sup> Guijun Li,<sup>b†</sup> Hon-Fai Wong,<sup>b</sup> Sheung-Mei Ng,<sup>b</sup> Sze-Chun Yiu,<sup>a</sup>  
Cheuk-Lam Ho,<sup>a\*</sup> Chi-Wah Leung,<sup>b\*</sup> Ian Manners<sup>d\*</sup> and Wai-Yeung Wong<sup>ae\*</sup>

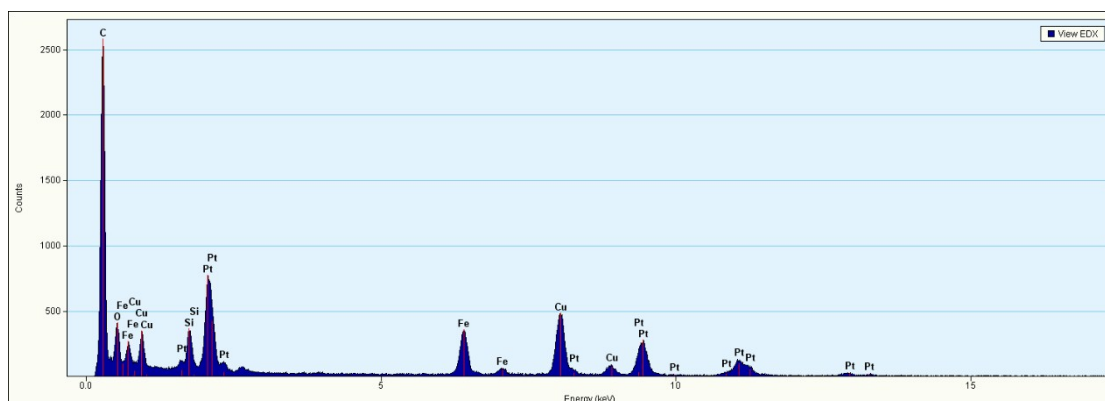

**Figure S1** EDX spectrum of FePt nanoparticles synthesized under Ar/H<sub>2</sub> atmosphere.

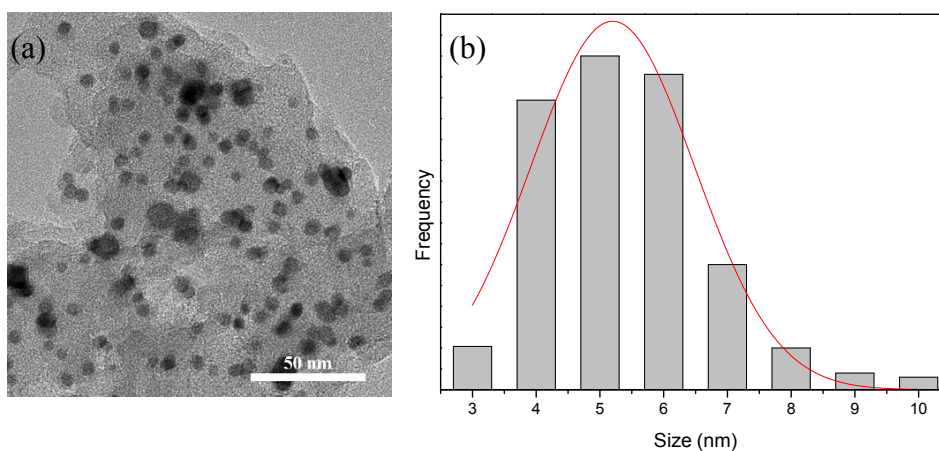

**Figure S2** (a) TEM image of the resultant FePt nanoparticles by pyrolysis of the precursor **P** under Ar atmosphere; (b) size distribution of FePt NPs determined by statistical analysis from the TEM images.

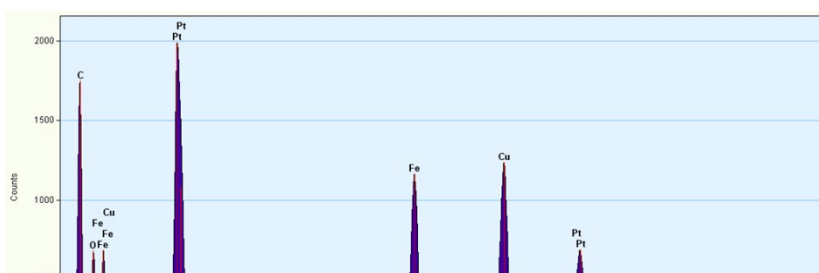

**Figure S3** EDX spectrum of FePt nanoparticles synthesized under Ar atmosphere.

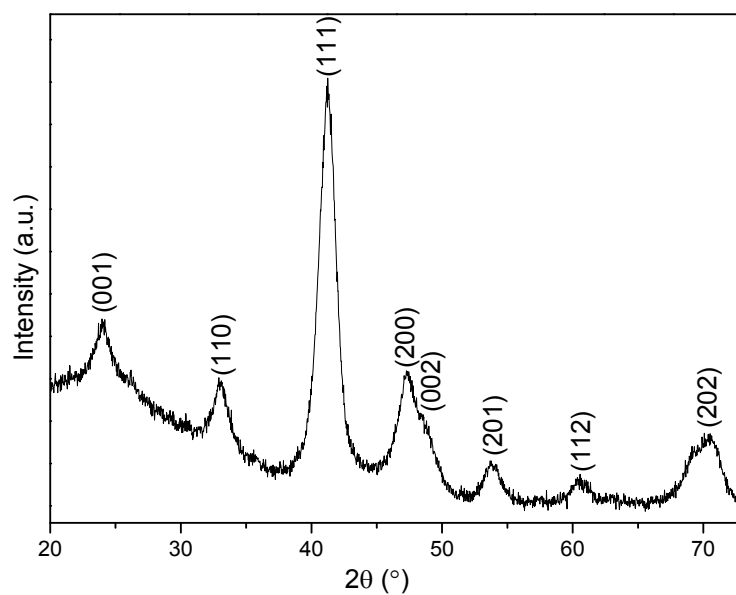

**Figure S4** XRD pattern of FePt nanoparticles synthesized under Ar atmosphere.

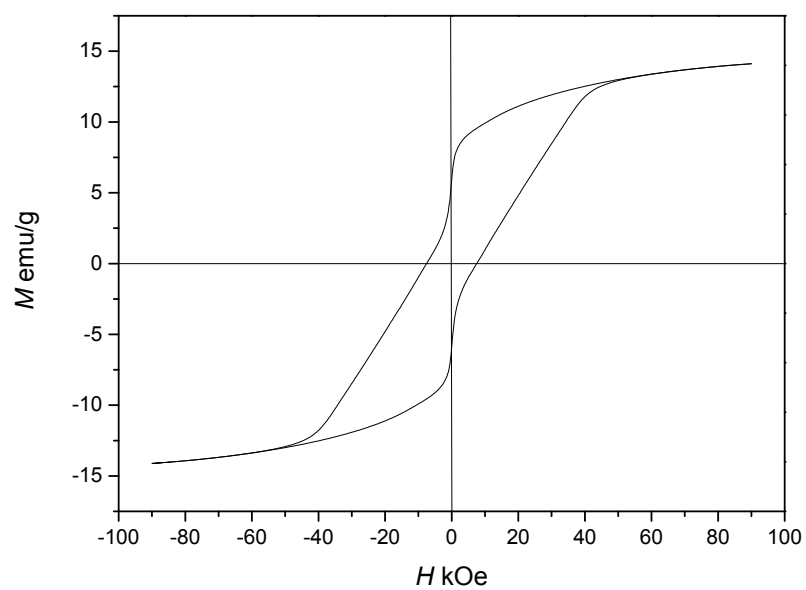

**Figure S5** Room temperature hysteresis loop of FePt nanoparticles synthesized under Ar atmosphere.
